# Supplementary material
Source: PubMed Central journal article supplement (PMC4149057)
Supplement: NIHMS610125-supplement-Supplementary__Appendix__online_only_material__etc__.pdf [file NIHMS610125-supplement-Supplementary__Appendix__online_only_material__etc__.pdf]

| Supplementary Table 1. Pearson correlations for selected independent variables. |                         |                         |                                    |                                      |                         |
|---------------------------------------------------------------------------------|-------------------------|-------------------------|------------------------------------|--------------------------------------|-------------------------|
| Parameter                                                                       | Age<br>(yr)             | Height<br>(cm)          | MMA <sub>S</sub><br>( $\mu$ mol/L) | MMA <sub>U</sub><br>(mmol/mol<br>Cr) | Creatinine<br>(mg/dL)   |
| Height<br>(cm)                                                                  | 0.8548<br>( $<0.0001$ ) |                         |                                    |                                      |                         |
| MMA <sub>S</sub><br>( $\mu$ mol/L)                                              | 0.2348<br>(0.0373)      | 0.1937<br>(0.0959)      |                                    |                                      |                         |
| MMA <sub>U</sub><br>(mmol/mol<br>Cr)                                            | -0.2555<br>(0.0230)     | -0.3062<br>(0.0043)     | 0.2791<br>(0.0153)                 |                                      |                         |
| Creatinine<br>(mg/dL)                                                           | 0.5026<br>( $<0.0001$ ) | 0.4723<br>( $<0.0001$ ) | 0.8075<br>( $<0.0001$ )            | 0.0389<br>(0.7338)                   |                         |
| Cystatin C<br>(mg/L)                                                            | 0.0812<br>(0.6535)      | 0.0681<br>(0.7066)      | 0.7684<br>( $<0.0001$ )            | 0.0096<br>(0.9583)                   | 0.7901<br>( $<0.0001$ ) |

Supplementary Table 1. Pearson correlations between age, height, serum methylmalonic acid (MMA<sub>S</sub>), urine methylmalonic acid (MMA<sub>U</sub>), serum creatinine (Cr) and cystatin C. *p*-values in (). Many values such as height and age (0.8231) demonstrate multicollinearity.

| Supplementary Table 2. Correlation Coefficients |                                   |                      |                      |                                  |
|-------------------------------------------------|-----------------------------------|----------------------|----------------------|----------------------------------|
| Serum Creatinine (mg/dL)                        | Correlation Coefficient ( $R^2$ ) |                      |                      |                                  |
|                                                 | MMA <sub>S</sub> , Ht             | Serum cystatin C, Ht | Serum creatinine, Ht | eGFR creatinine - cystatin C, Ht |
| < 1.2                                           | 0.737                             | *                    | 0.762                | *                                |
| < 1.5                                           | 0.727                             | 0.723                | 0.750                | 0.656                            |
| < 2.0                                           | 0.733                             | 0.745                | 0.755                | 0.680                            |
| < 2.5                                           | 0.733                             | 0.766                | 0.757                | 0.720                            |
| all values                                      | 0.703                             | 0.767                | 0.714                | 0.713                            |

Supplementary Table 2. Comparison of correlation coefficients ( $R^2$ ) for regressions using models based on serum methylmalonic acid (MMA<sub>S</sub>), serum cystatin C, serum creatinine, and eGFR creatinine - cystatin C stratified by creatinine levels. Insignificant models (*Beta* coefficients with  $p > 0.05$ ) marked with an \*.

| Supplementary Table 3. |              |                      |                          |                          |
|------------------------|--------------|----------------------|--------------------------|--------------------------|
| Enzymatic subtype      | Observations | Serum Creatinine     | Serum Methylmalonic acid | Urine Methylmalonic acid |
| <i>mut</i>             |              |                      |                          |                          |
| ≤ 10 years             | 34           | 0.71<br>(0.4-0.9)    | 661.3<br>(214-820)       | 5414<br>(2041-6000)      |
| 11 to 20 years         | 17           | 1.08<br>(0.62-1.28)  | 855.9<br>(221-1198)      | 2852.8<br>(1441-3739)    |
| >20 years              | 12           | 2.49<br>(1.29-3.71)  | 2628<br>(663-4610)       | 4380<br>(1224-5716)      |
| <i>cbIA</i>            |              |                      |                          |                          |
| ≤ 10 years             | 4            | 0.308<br>(0.26-0.36) | 15.0<br>(12.3-20.6)      | 661.3<br>(365-903)       |
| 11 to 20 years         | 5            | 0.818<br>(0.6-0.9)   | 51.6<br>(31.1-72)        | 1495.4<br>(289-3294)     |
| >20 years              | 5            | 0.98<br>(0.7-1.36)   | 157.1<br>(46-214)        | 1185.2<br>(731-973)      |
| <i>cbIB</i>            |              |                      |                          |                          |
| ≤ 10 years             | 2            | 0.64<br>(0.41-0.87)  | 1273.5                   | 12660                    |
| 11 to 20 years         | 1            | 1.93                 | 1786                     | 2585                     |
| >20 years              | 4            | 1.25<br>(1.03-1.37)  | 373.5<br>(42-755)        | 1268<br>(413.5-2140)     |

Supplementary Table 3. Means and interquartile range (in parenthesis) of serum and urine laboratory values stratified by enzymatic subtype and age. Serum creatinine units are given in mg/dL (reference values are age/gender dependent); serum methylmalonic acid in  $\mu\text{mol/L}$  (reference:  $\leq 0.40 \mu\text{mol/L}$ ); urine methylmalonic acid in mmol/mol creatinine (reference:  $< 3.60 \text{ mmol/mol creatinine}$ ).

Supplementary Figure 1. Laboratory measurements vs. Age

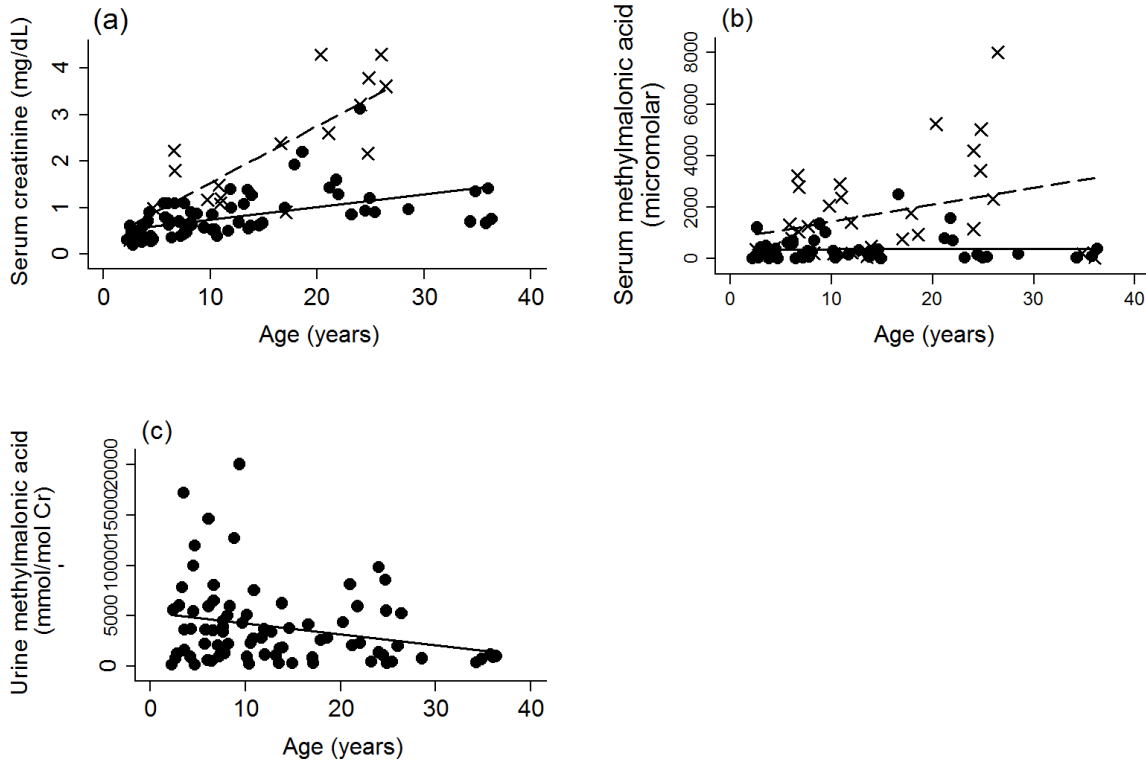

Supplementary Figure 1. (a) Serum creatinine vs. age. Circles and solid fitted line represent patients with serum methylmalonic acid levels below 2000 micromolar and X's and dashed lines represent serum methylmalonic levels above 2000 micromolar; (b) Serum methylmalonic acid vs. age. Circles and solid fitted line represent patients with eGFR creatinine levels above 60 mL/min/1.73m<sup>2</sup> and X's and dashed lines represent eGFR creatinine below 60; (c) Urine methylmalonic acid vs. age.

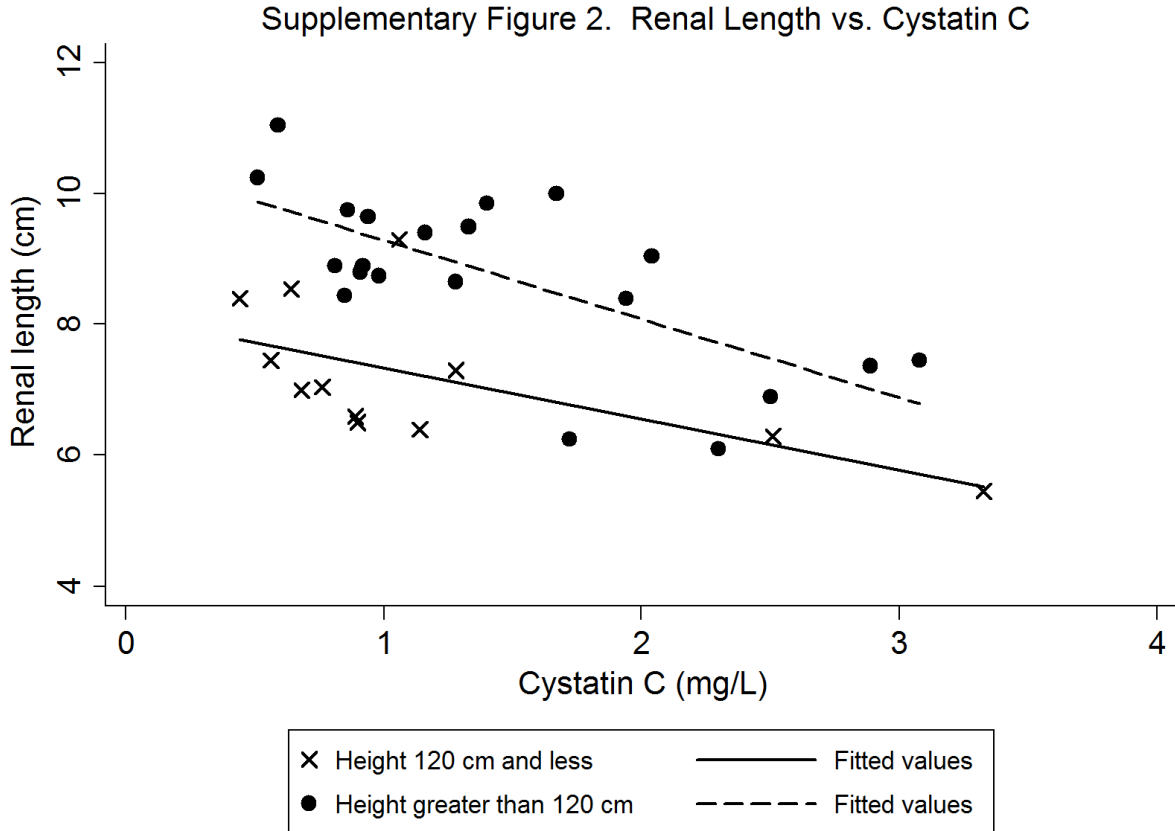

Supplementary Figure 2. Renal length (average of left and right), stratified by height, is inversely proportional to cystatin C. This graph represents the most predictive renal length model, incorporating the predictors cystatin C and height.
